# Supplementary material
Source: publisher figshare collection journal article supplement (https://frontiersin.figshare.com/ndownloader/files/25975850)
Supplement: Supplementary file 1 [file 25975850]

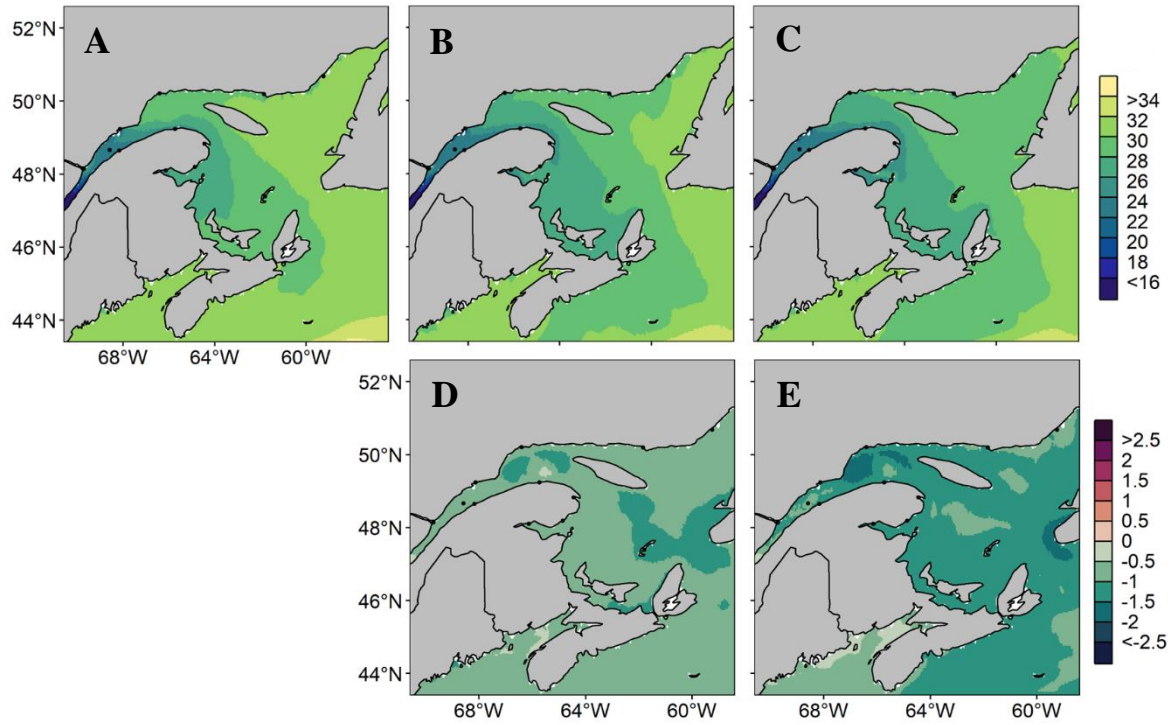

**Supplementary Figure S1.** Average sea surface salinity from May through October along Canada's East Coast under MPI-ESM-LR RCP 4.5 for (A) 1999-2008, (B) 2050-2059 and (C) 2090-2099 and difference in average sea surface salinity between (D) 1999-2008 and 2050-2059 and (E) 1999-2008 and 2090-2099.

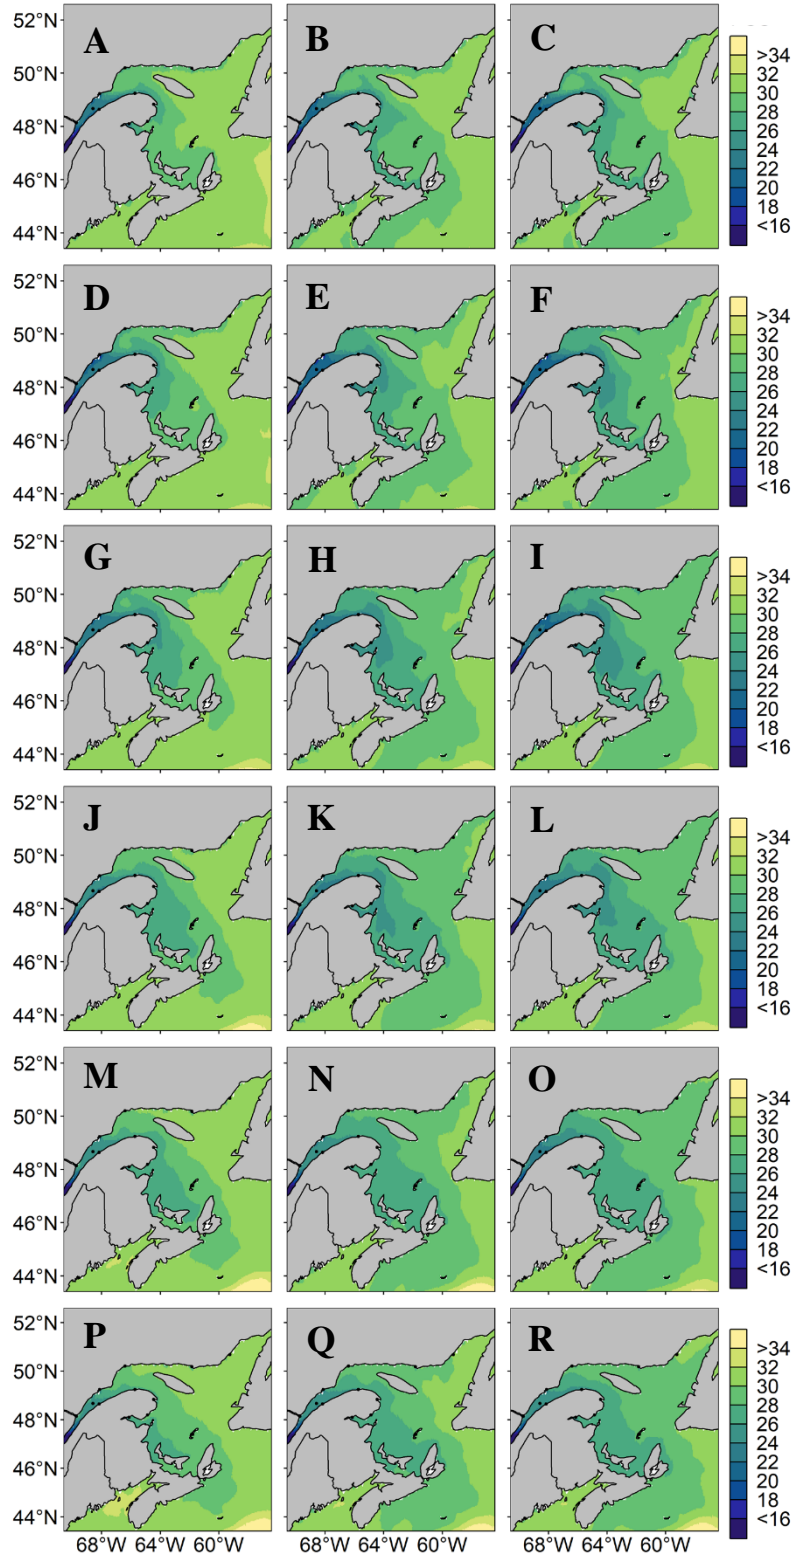

**Supplementary Figure S2.** Average sea surface salinity along Canada's East Coast under MPI-ESM-LR RCP 4.5 for (A) May 1999-2008, (B) May 2050-2059 and (C) May 2090-2099. Same pattern applies for (D-F) June, (G-I) July, (J-L) August, (M-O) September and (P-R) October.

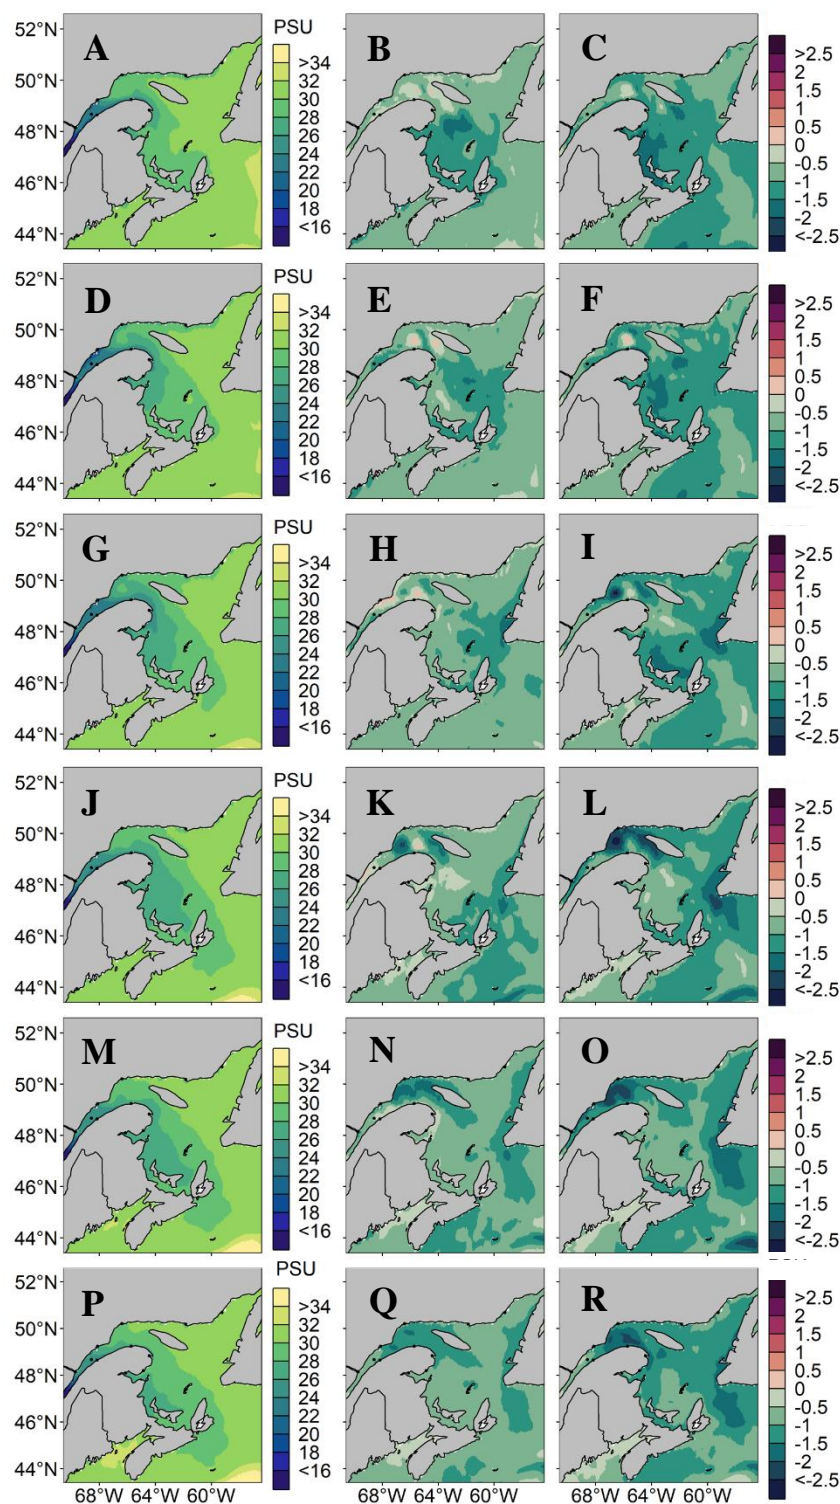

**Supplementary Figure S3.** Average sea surface salinity along Canada's East Coast under MPI-ESM-LR RCP 4.5 for (A) May 1999-2008, (B) difference in average sea surface salinity between May 1999-2008 and 2050-2059 and (C) difference in average sea surface salinity between May 1999-2008 and 2090-2099. Same pattern applies for (D-F) June, (G-I) July, (J-L) August, (M-O) September and (P-R) October.

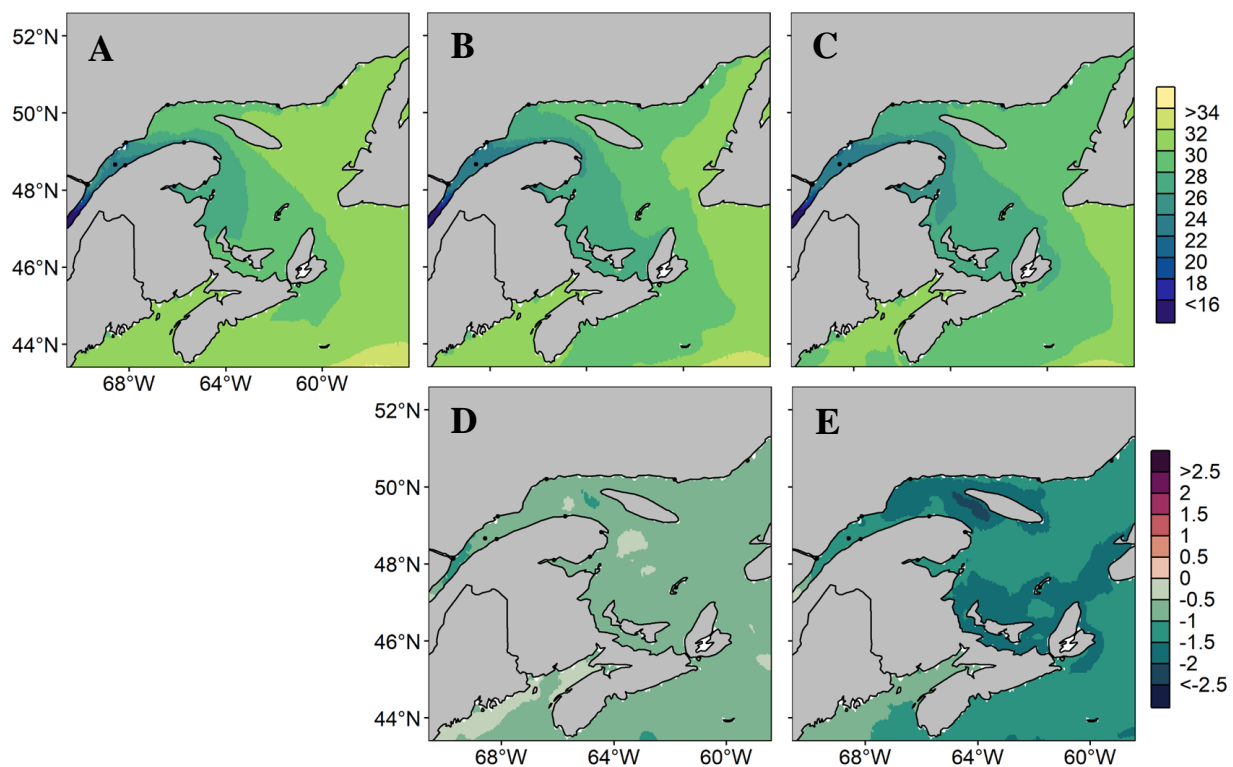

**Supplementary Figure S4.** Average sea surface salinity from May through October along Canada's East Coast under MPI-ESM-LR RCP 8.5 for (A) 1999-2008, (B) 2050-2059 and (C) 2090-2099 and difference in average sea surface salinity between (D) 1999-2008 and 2050-2059 and (E) 1999-2008 and 2090-2099.



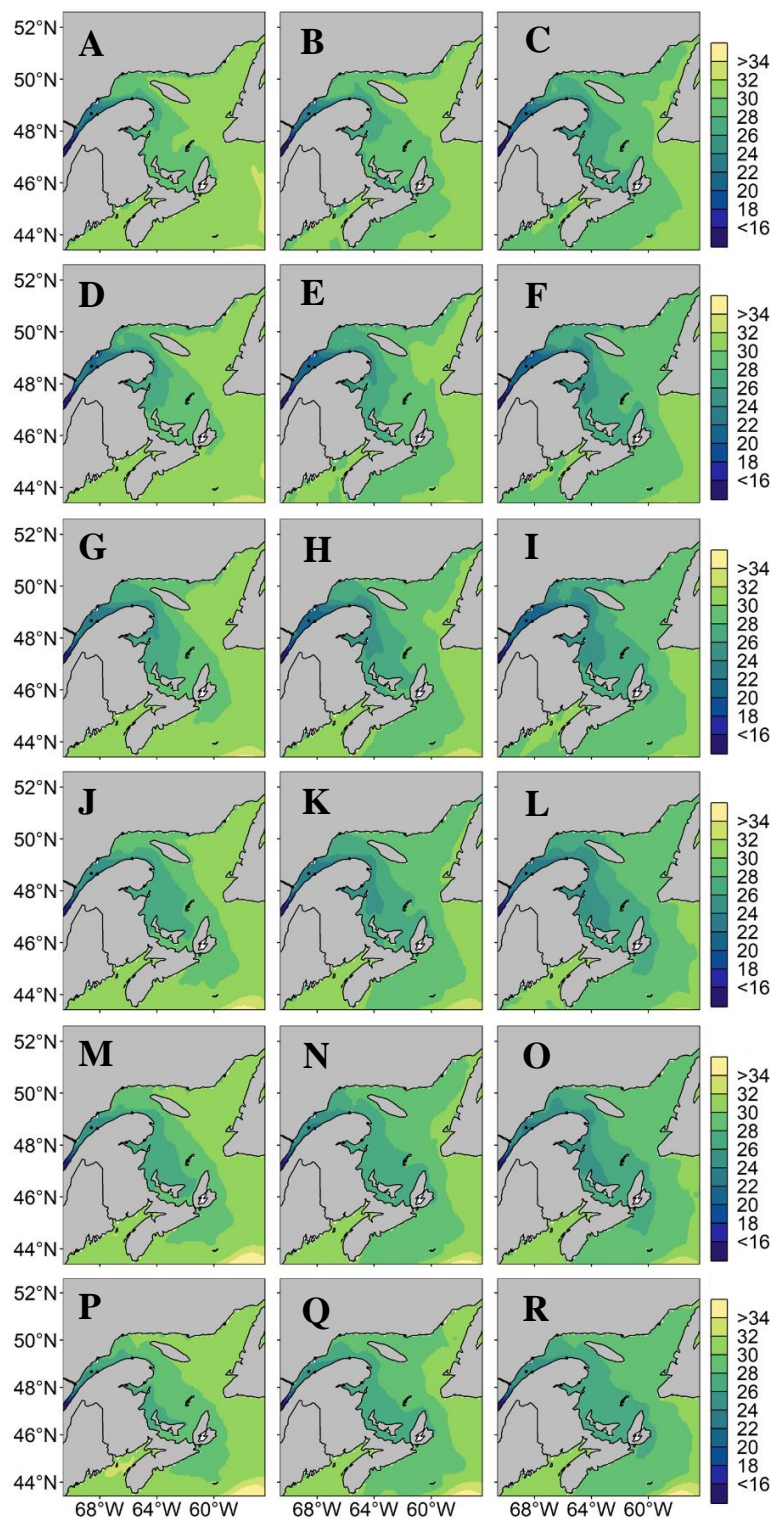

**Supplementary Figure S5.** Average sea surface salinity along Canada's East Coast under MPI-ESM-LR RCP 8.5 for (A) May 1999-2008, (B) May 2050-2059 and (C) May 2090-2099. Same pattern applies for (D-F) June, (G-I) July, (J-L) August, (M-O) September and (P-R) October.

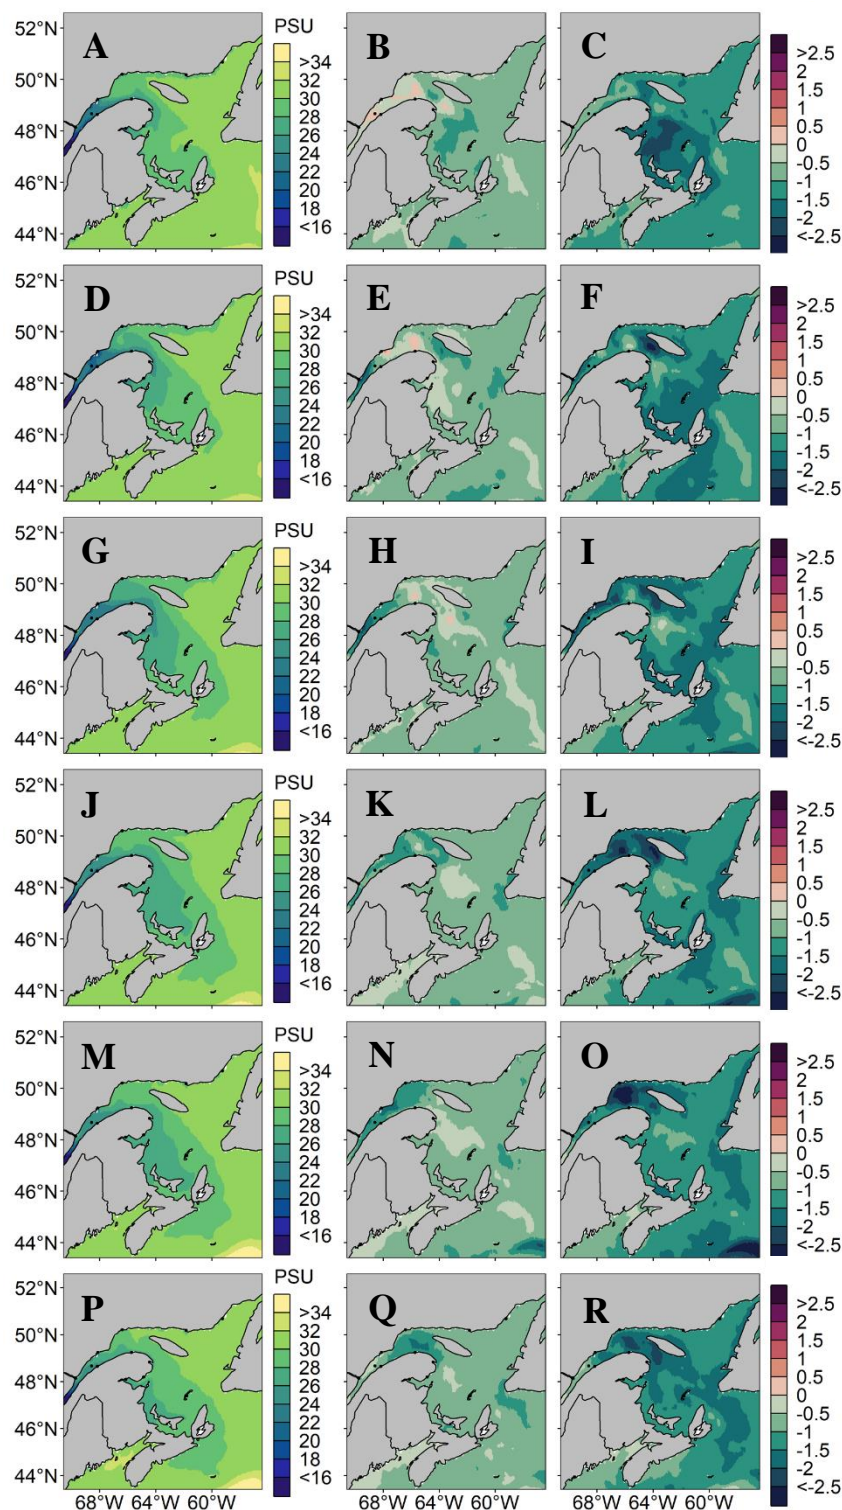

**Supplementary Figure S6.** Average sea surface salinity along Canada's East Coast under MPI-ESM-LR RCP 8.5 for (A) May 1999-2008, (B) difference in average sea surface salinity between May 1999-2008 and 2050-2059 and (C) difference in average sea surface salinity between May 1999-2008 and 2090-2099. Same pattern applies for (D-F) June, (G-I) July, (J-L) August, (M-O) September and (P-R) October.

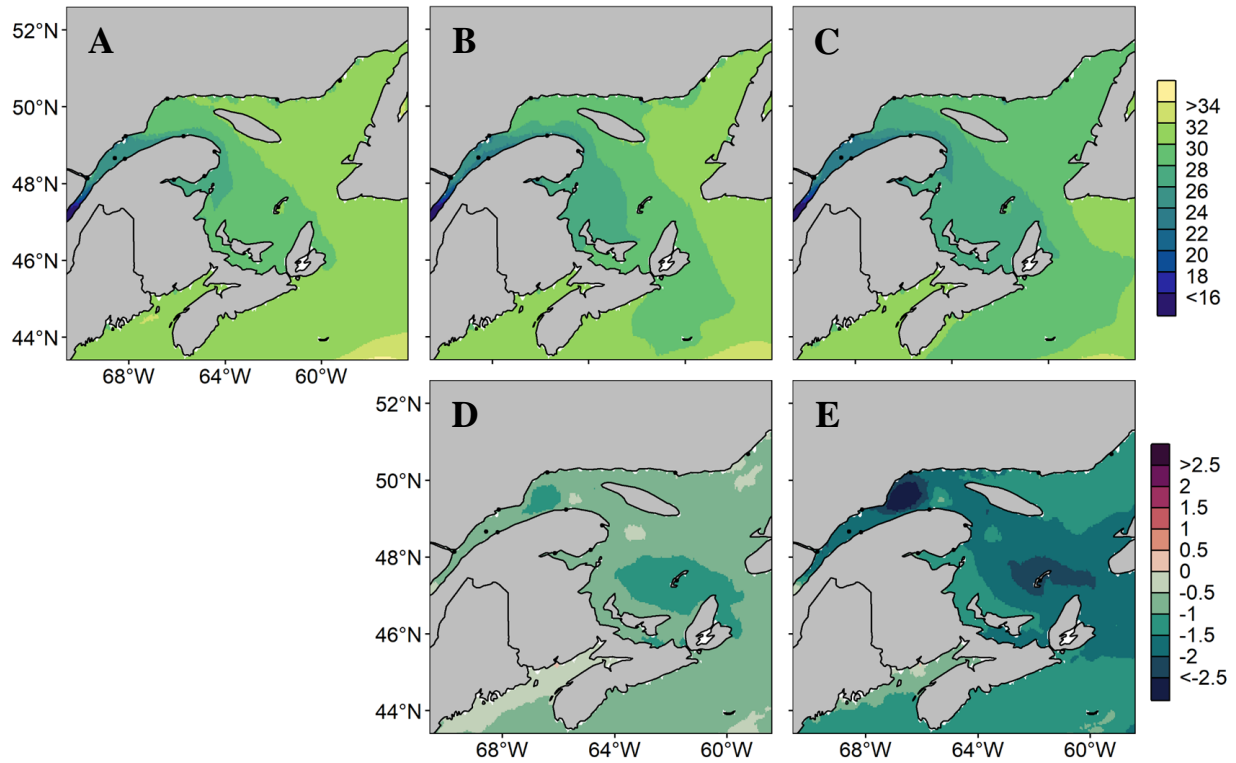

**Supplementary Figure S7.** Average sea surface salinity from May through October along Canada's East Coast under CanESM2 RCP 8.5 for (A) 1999-2008, (B) 2050-2059 and (C) 2090-2099 and difference in average sea surface salinity between (D) 1999-2008 and 2050-2059 and (E) 1999-2008 and 2090-2099.



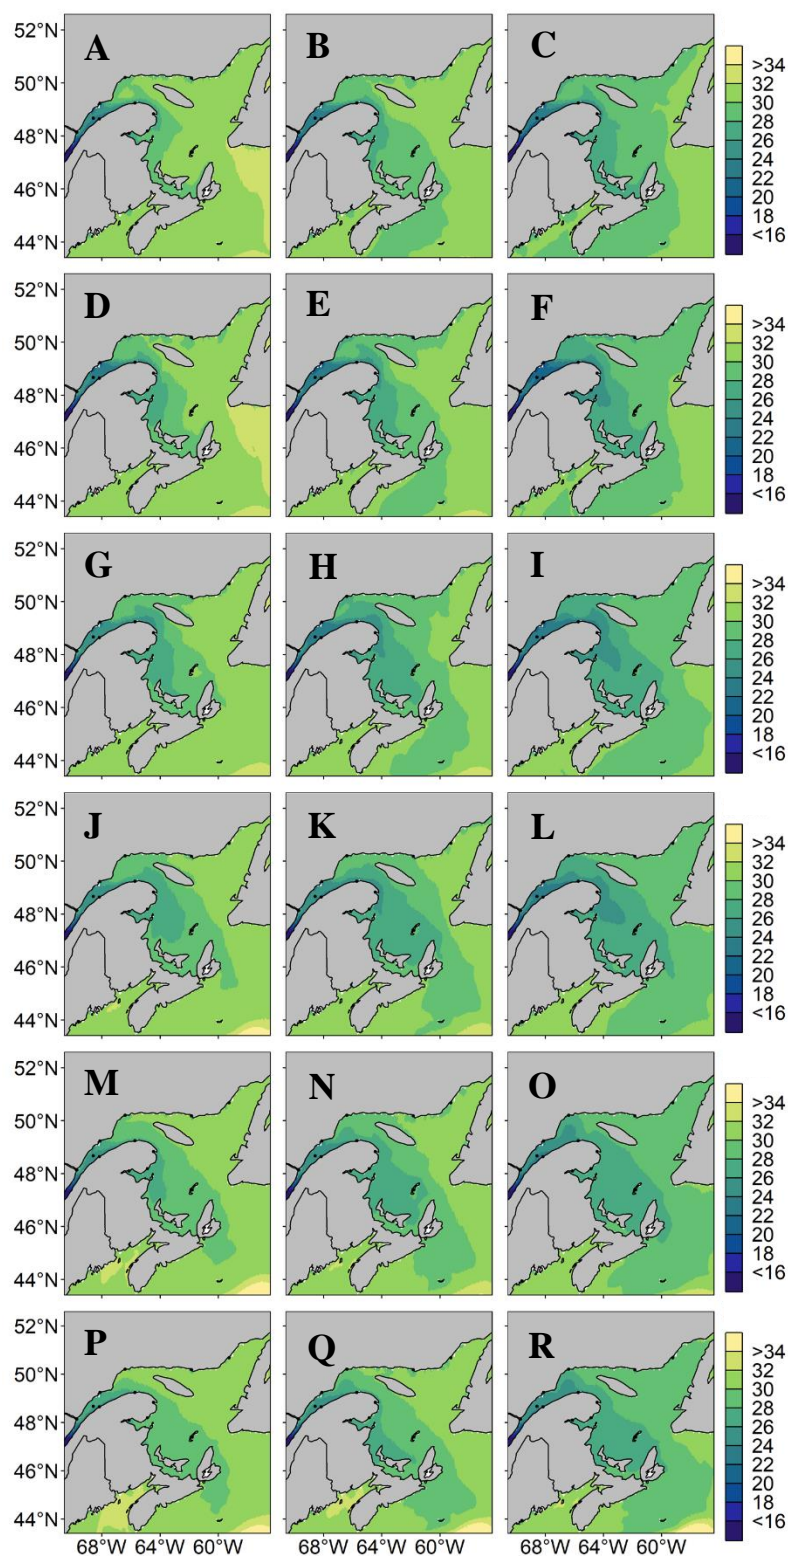

**Supplementary Figure S8.** Average sea surface salinity along Canada's East Coast under CanESM2 RCP 8.5 for (A) May 1999-2008, (B) May 2050-2059 and (C) May 2090-2099. Same pattern applies for (D-F) June, (G-I) July, (J-L) August, (M-O) September and (P-R) October.



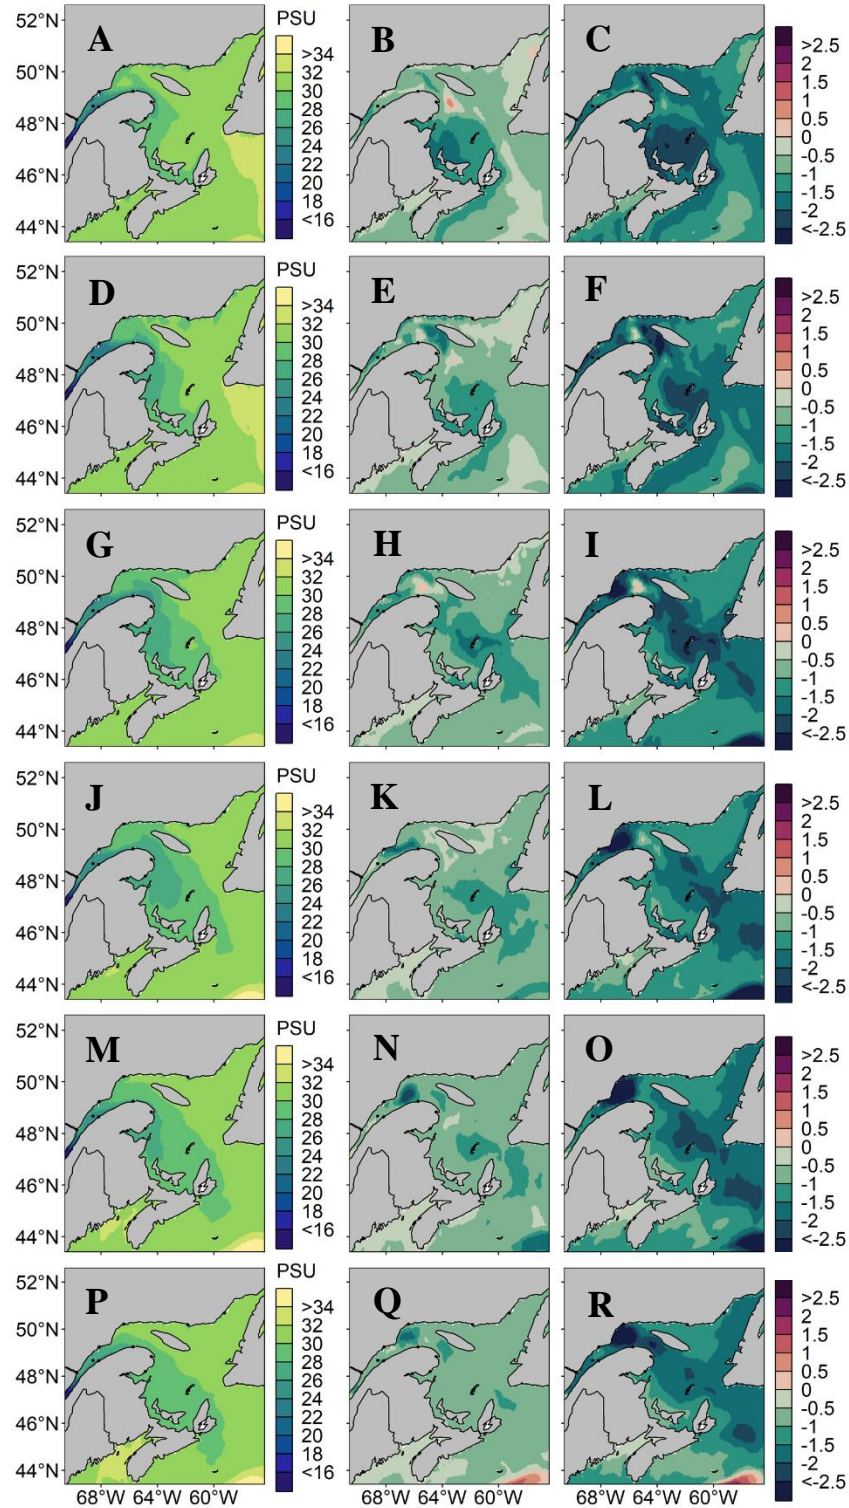

**Supplementary Figure S9.** Average sea surface salinity along Canada's East Coast under CanESM2 RCP 8.5 for (A) May 1999-2008, (B) difference in average sea surface salinity between May 1999-2008 and 2050-2059 and (C) difference in average sea surface salinity between May 1999-2008 and 2090-2099. Same pattern applies for (D-F) June, (G-I) July, (J-L) August, (M-O) September and (P-R) October.

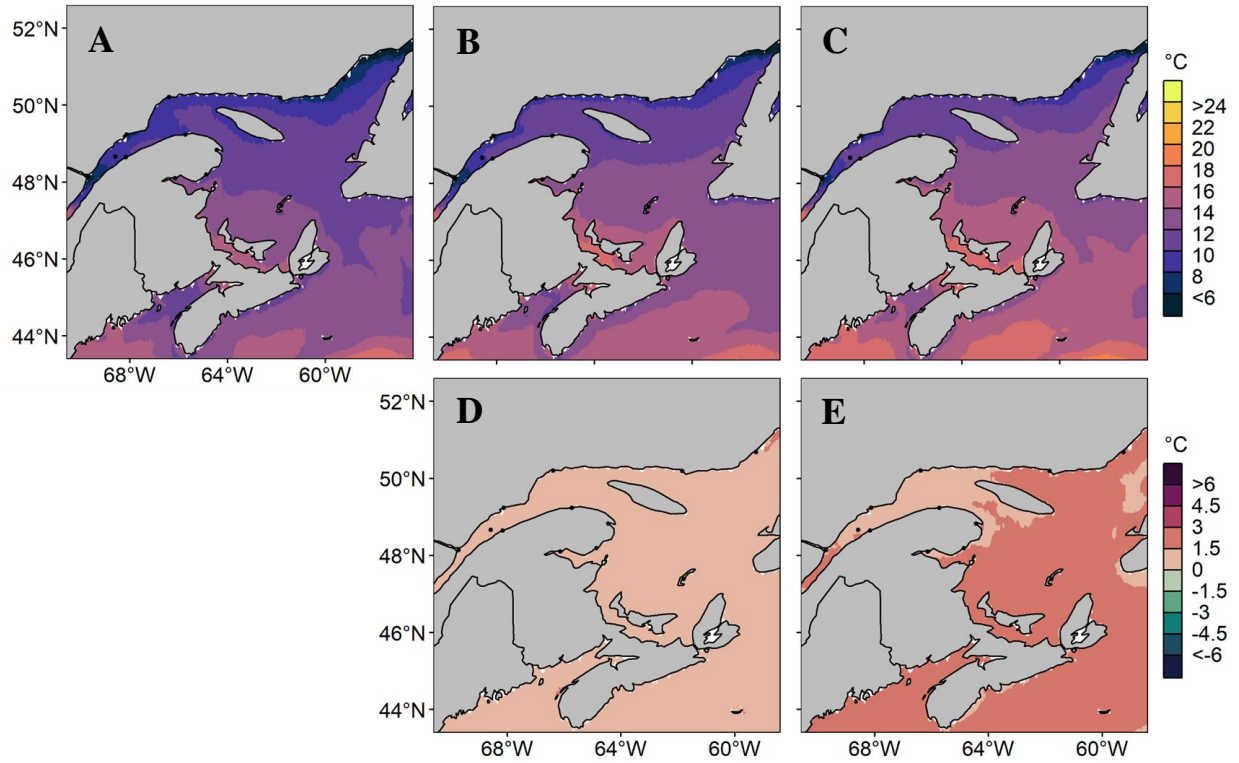

**Supplementary Figure S10.** Average sea surface temperature (°C) from May through October along Canada's East Coast under MPI-ESM-LR RCP 4.5 for (A) 1999-2008, (B) 2050-2059 and (C) 2090-2099 and difference in average sea surface temperature between (D) 1999-2008 and 2050-2059 and (E) 1999-2008 and 2090-2099.

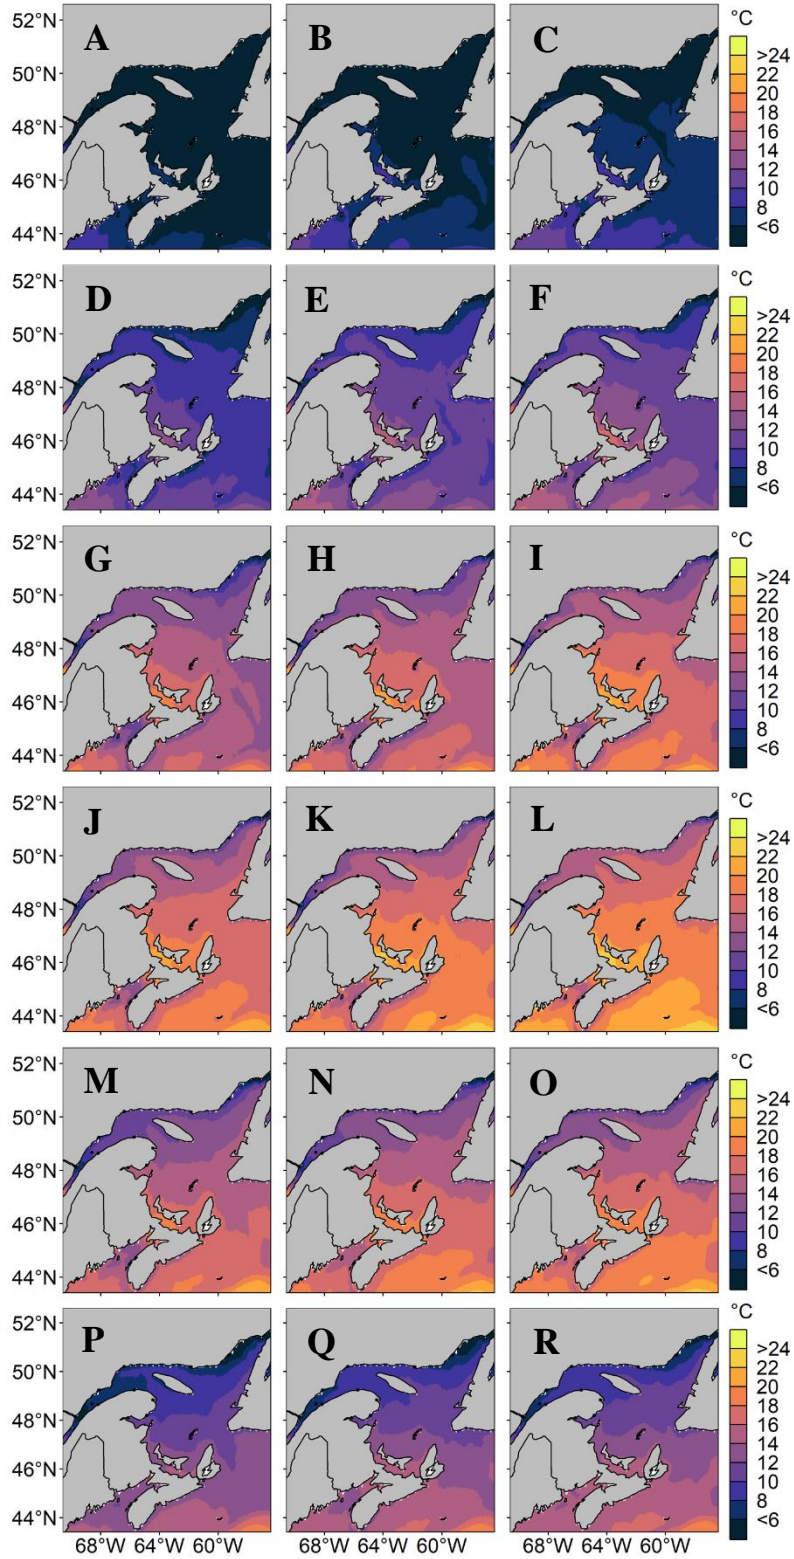

**Supplementary Figure S11.** Average sea surface temperature (°C) along Canada's East Coast under MPI-ESM-LR RCP 4.5 for (A) May 1999-2008, (B) May 2050-2059 and (C) May 2090-2099. Same pattern applies for (D-F) June, (G-I) July, (J-L) August, (M-O) September and (P-R) October.



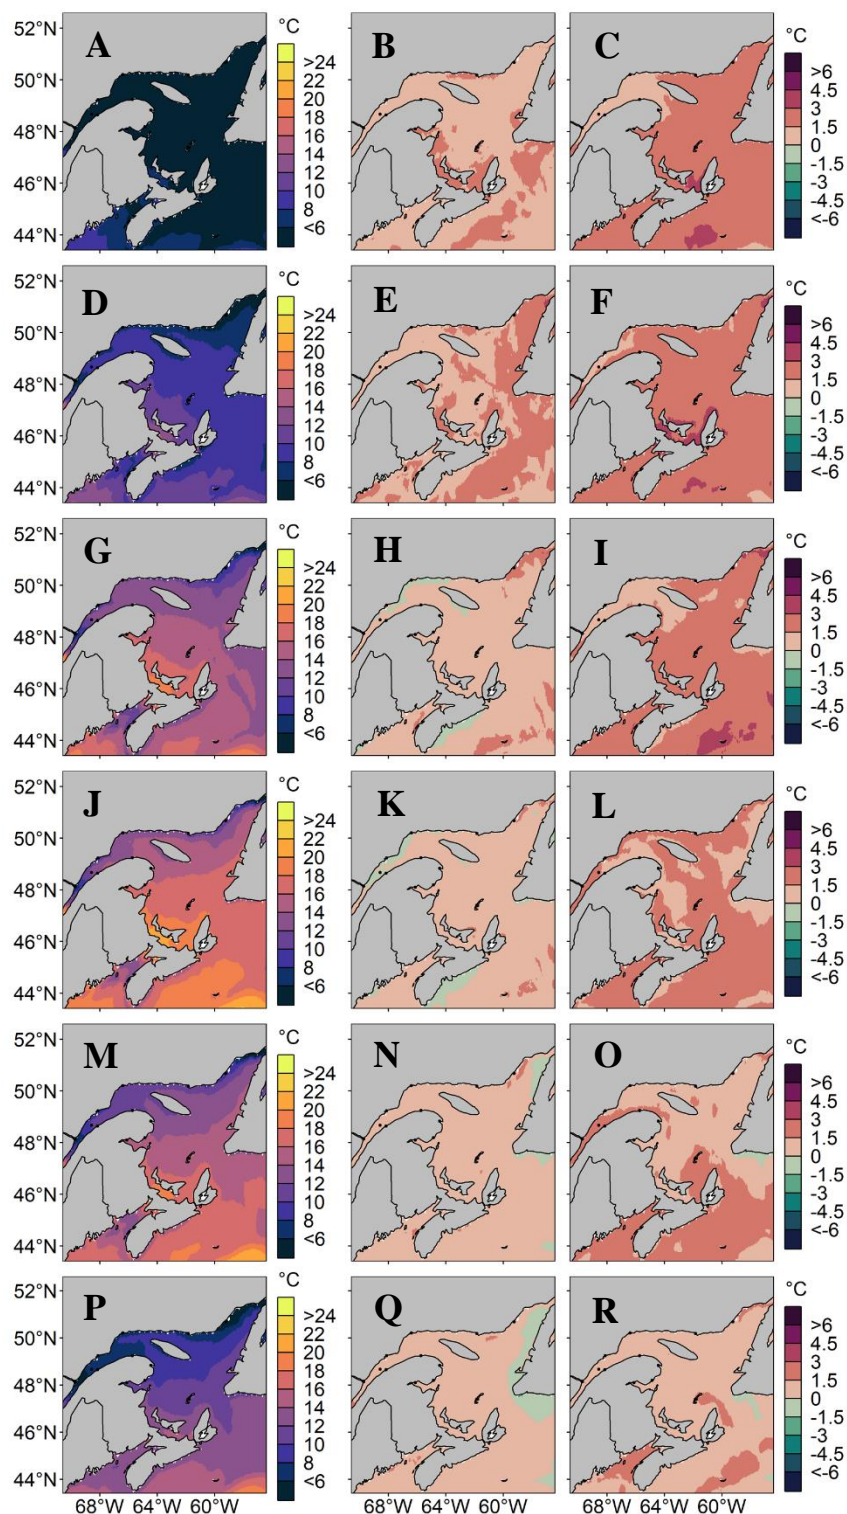

**Supplementary Figure S12.** Average sea surface temperature (°C) along Canada's East Coast under MPI-ESM-LR RCP 4.5 for (A) May 1999-2008, (B) difference in average sea surface temperature between May 1999-2008 and 2050-2059 and (C) difference in average sea surface temperature between May 1999-2008 and 2090-2099. Same pattern applies for (D-F) June, (G-I) July, (J-L) August, (M-O) September and (P-R) October.



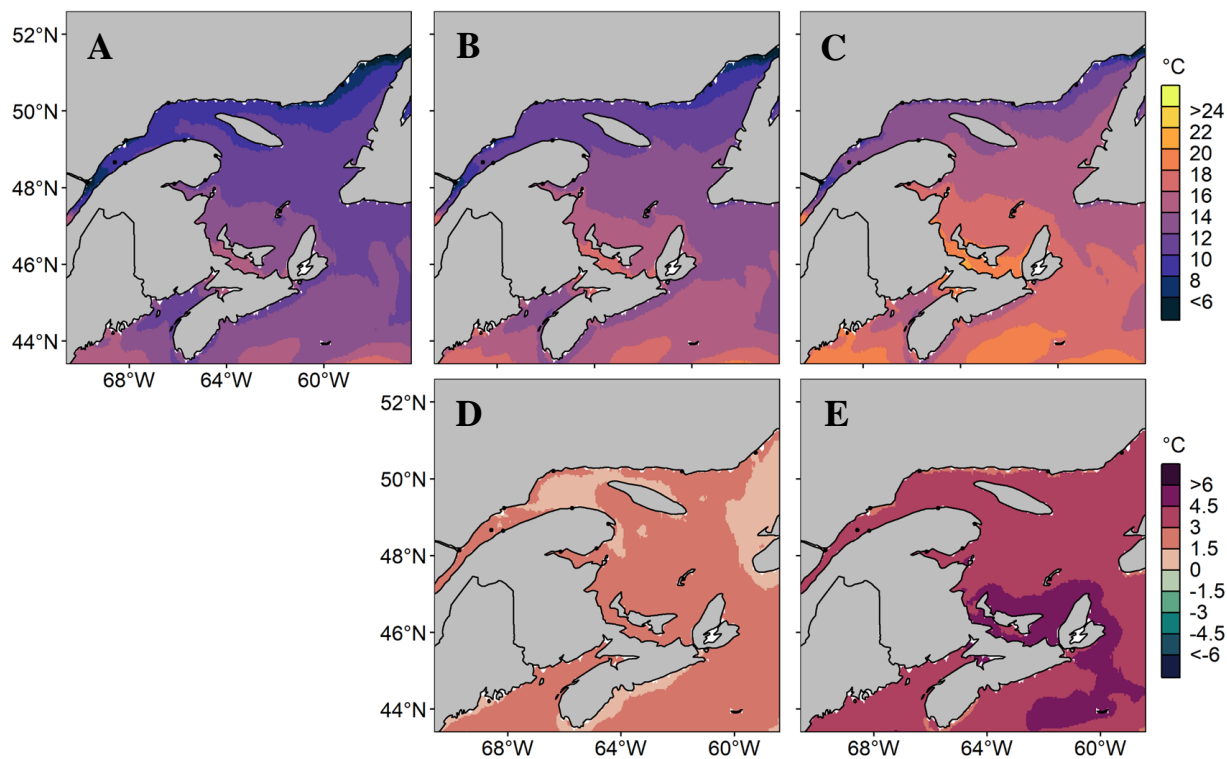

**Supplementary Figure S13.** Average sea surface temperature (°C) from May through October along Canada's East Coast under MPI-ESM-LR RCP 8.5 for (A) 1999-2008, (B) 2050-2059 and (C) 2090-2099 and difference in average sea surface temperature between (D) 1999-2008 and 2050-2059 and (E) 1999-2008 and 2090-2099.

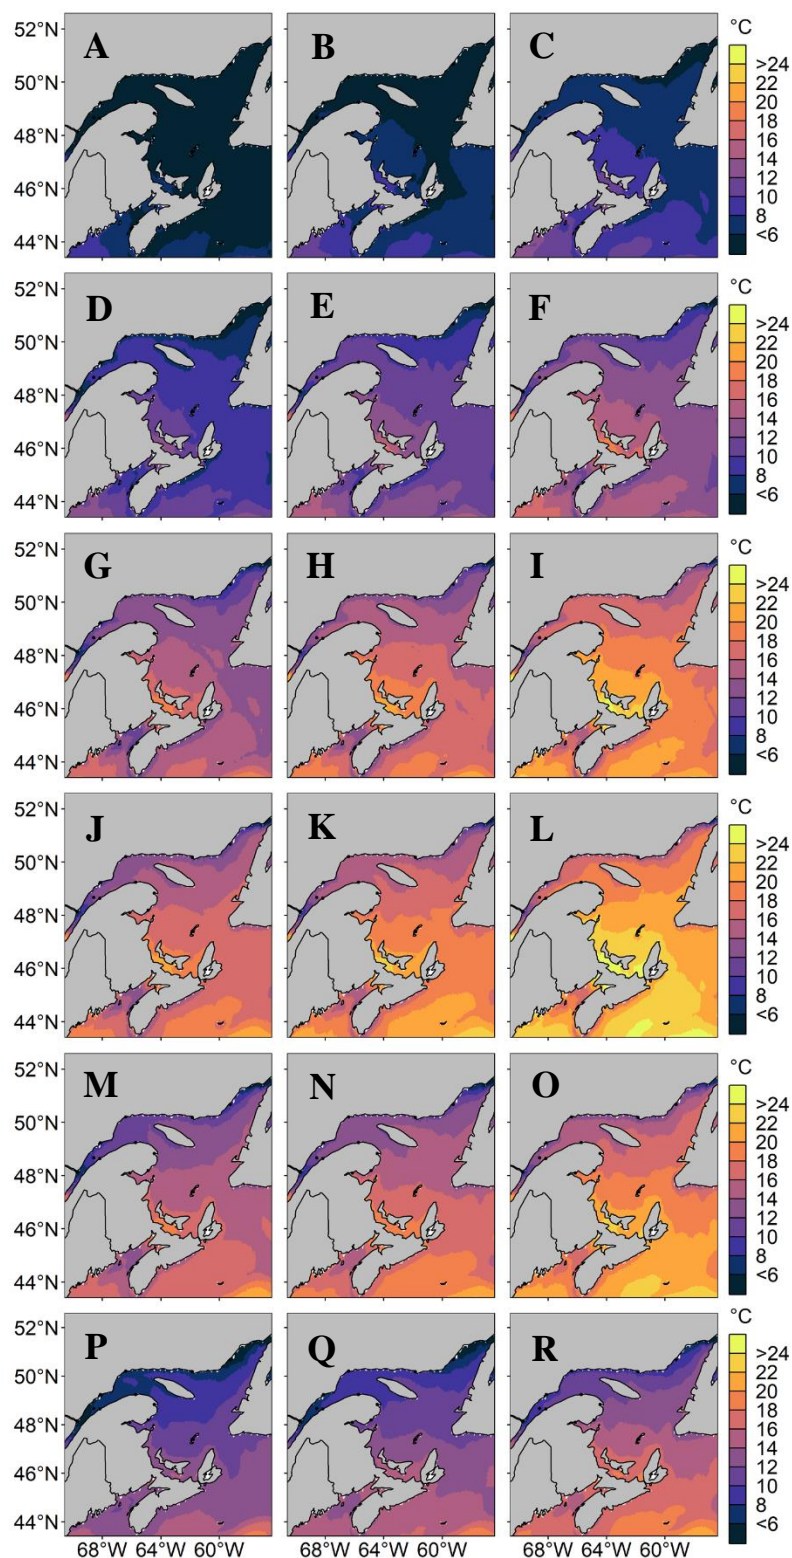

**Supplementary Figure S14.** Average sea surface temperature (°C) along Canada's East Coast under MPI-ESM-LR RCP 8.5 for (A) May 1999-2008, (B) May 2050-2059 and (C) May 2090-2099. Same pattern applies for (D-F) June, (G-I) July, (J-L) August, (M-O) September and (P-R) October.

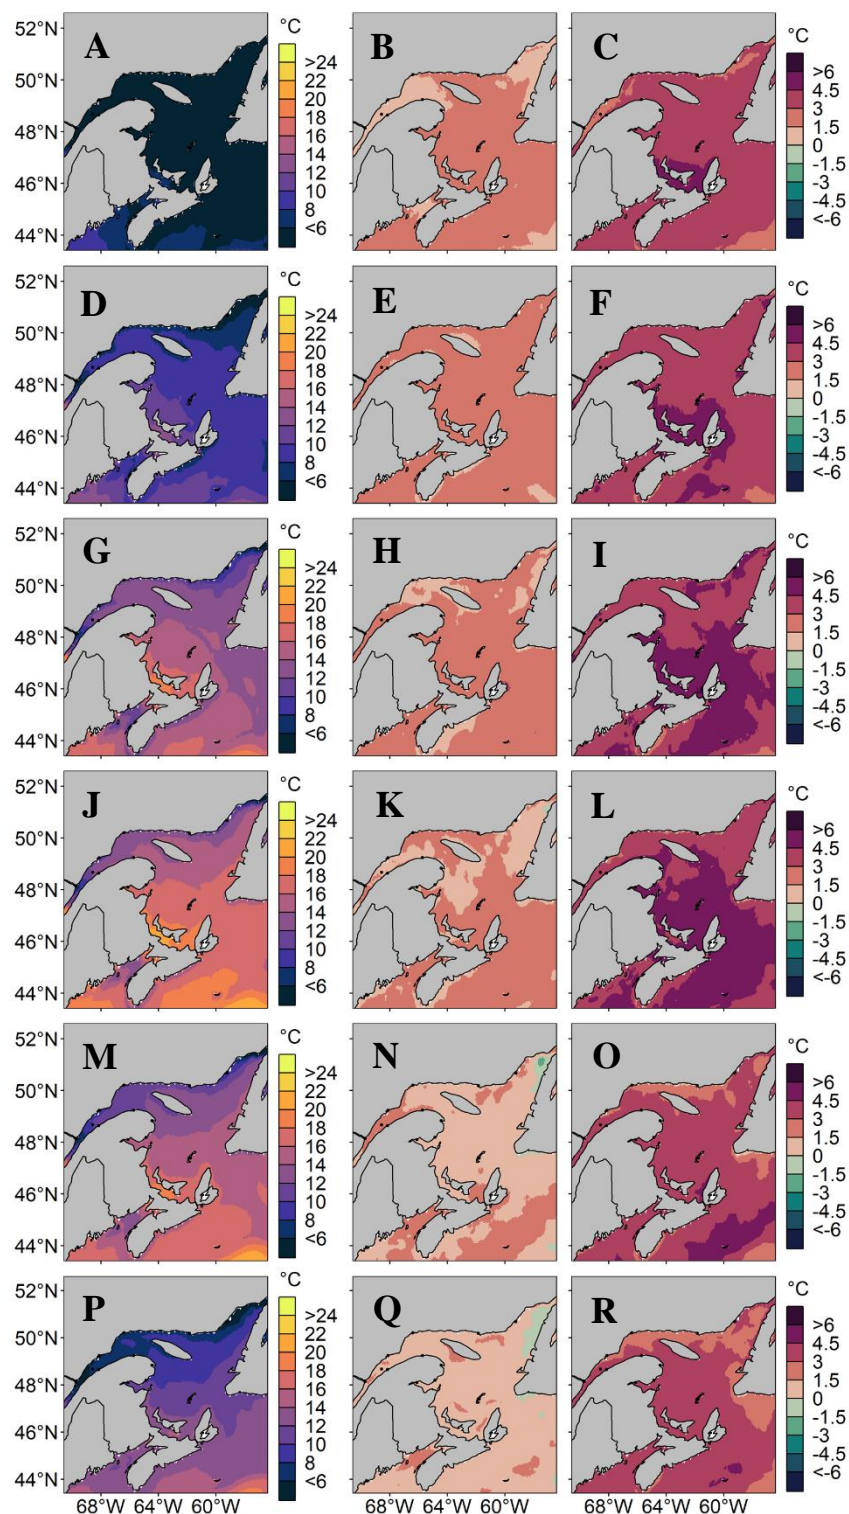

**Supplementary Figure S15.** Average sea surface temperature (°C) along Canada's East Coast under MPI-ESM-LR RCP 8.5 for (A) May 1999-2008, (B) difference in average sea surface temperature between May 1999-2008 and 2050-2059 and (C) difference in average sea surface temperature between May 1999-2008 and 2090-2099. Same pattern applies for (D-F) June, (G-I) July, (J-L) August, (M-O) September and (P-R) October.

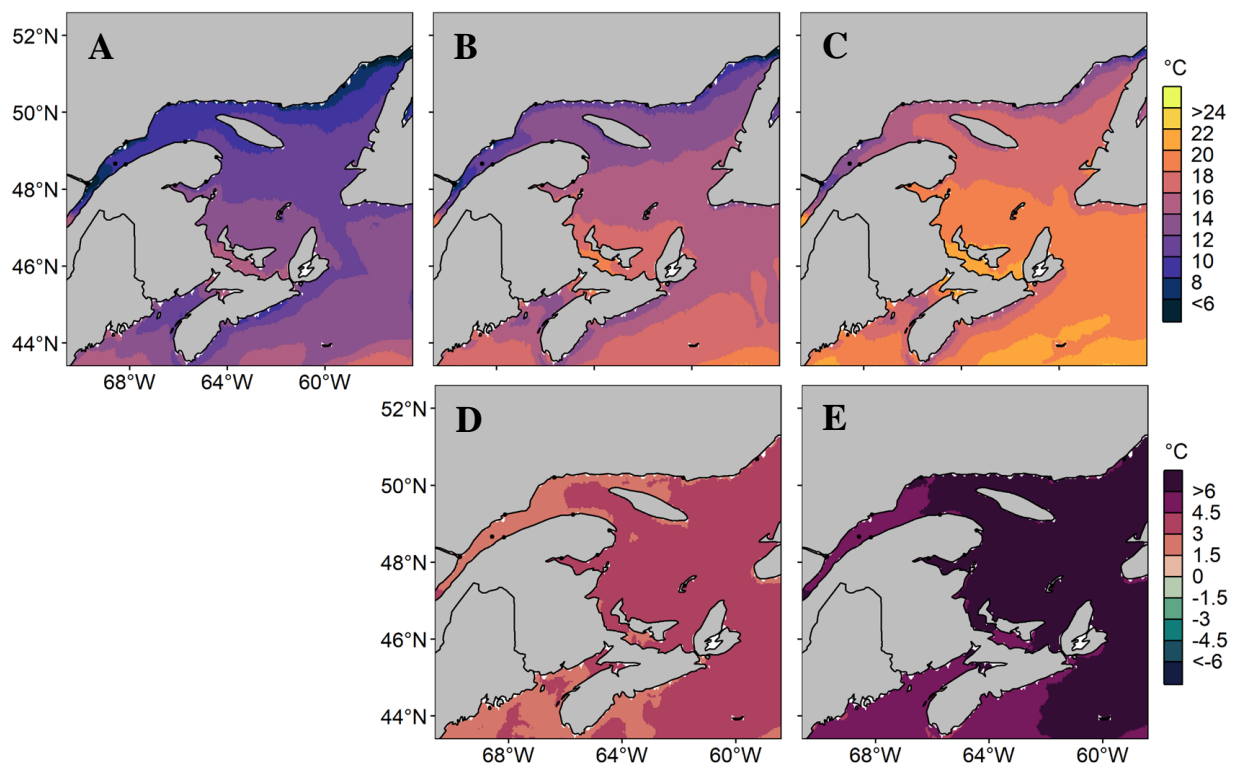

**Supplementary Figure S16.** Average sea surface temperature (°C) from May through October along Canada's East Coast under CanESM2 RCP 8.5 for (A) 1999-2008, (B) 2050-2059 and (C) 2090-2099 and difference in average sea surface temperature between (D) 1999-2008 and 2050-2059 and (E) 1999-2008 and 2090-2099.



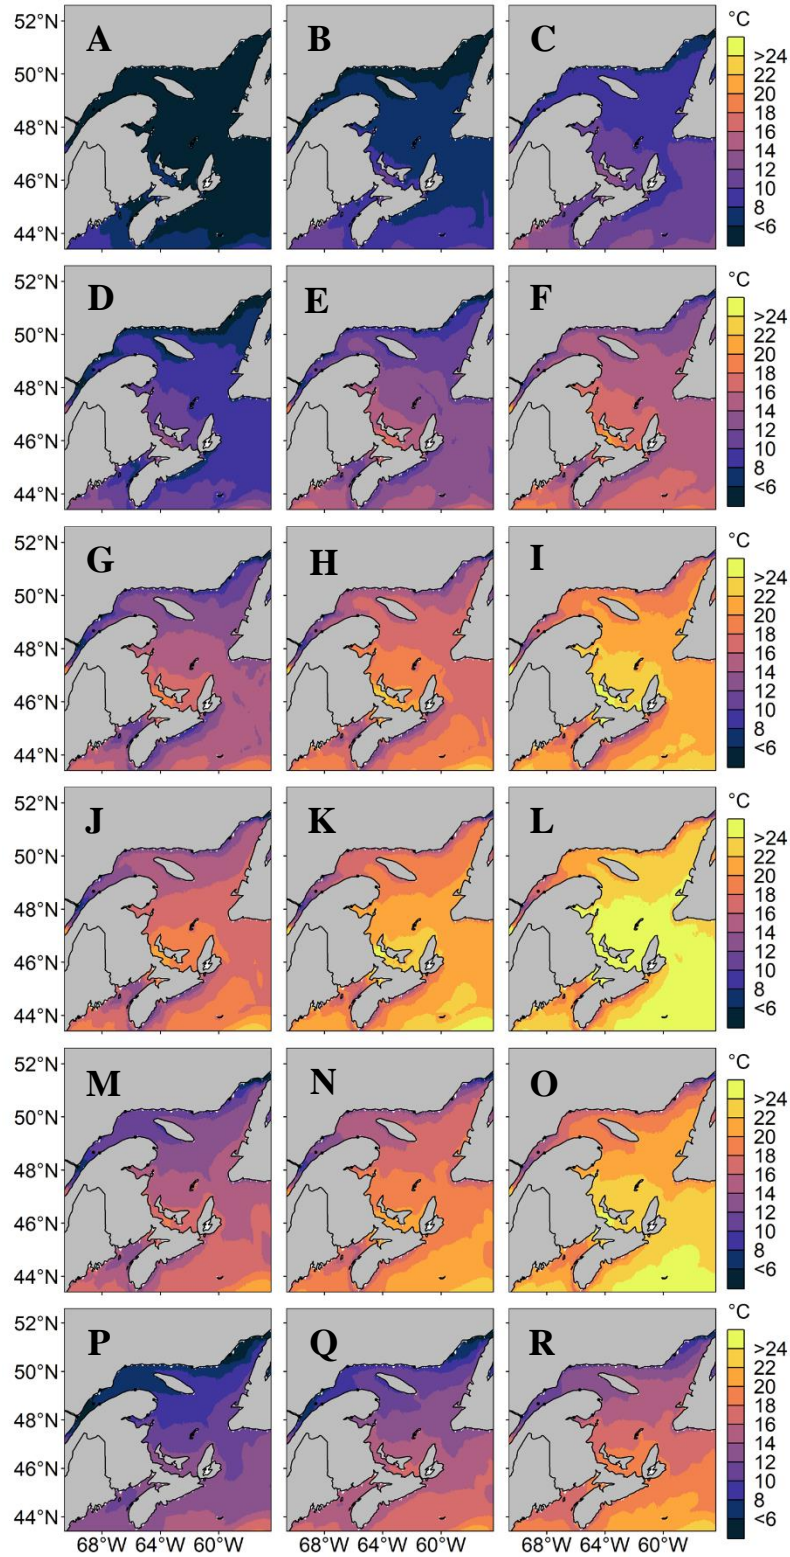

**Supplementary Figure S17.** Average sea surface temperature (°C) along Canada's East Coast under CanESM2 RCP 8.5 for (A) May 1999-2008, (B) May 2050-2059 and (C) May 2090-2099. Same pattern applies for (D-F) June, (G-I) July, (J-L) August, (M-O) September and (P-R) October.

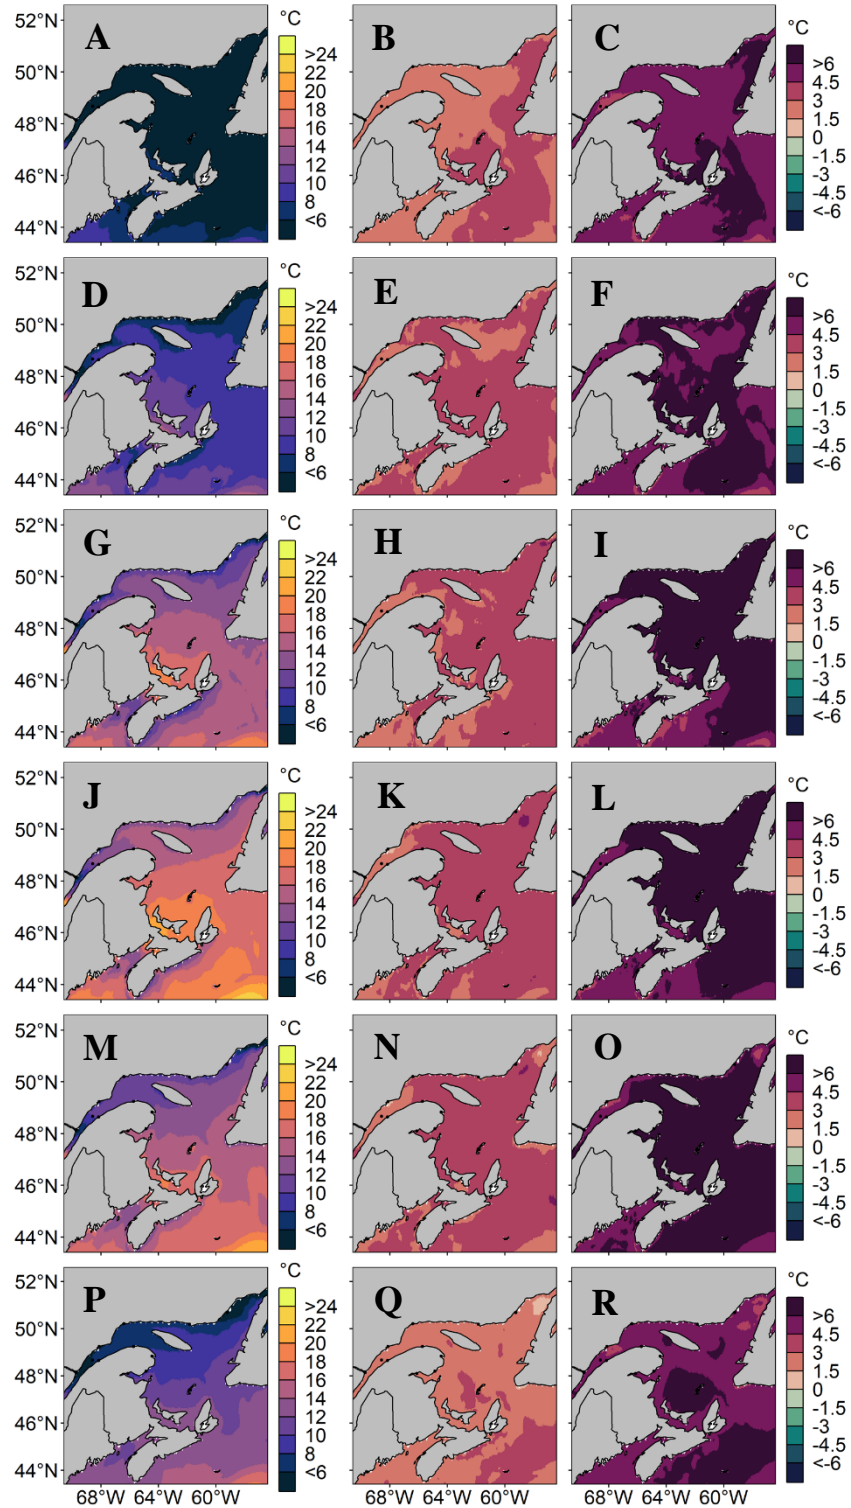

**Supplementary Figure S18.** Average sea surface temperature (°C) along Canada's East Coast under CanESM2 RCP 8.5 for (A) May 1999-2008, (B) difference in average sea surface temperature between May 1999-2008 and 2050-2059 and (C) difference in average sea surface temperature between May 1999-2008 and 2090-2099. Same pattern applies for (D-F) June, (G-I) July, (J-L) August, (M-O) September and (P-R) October.

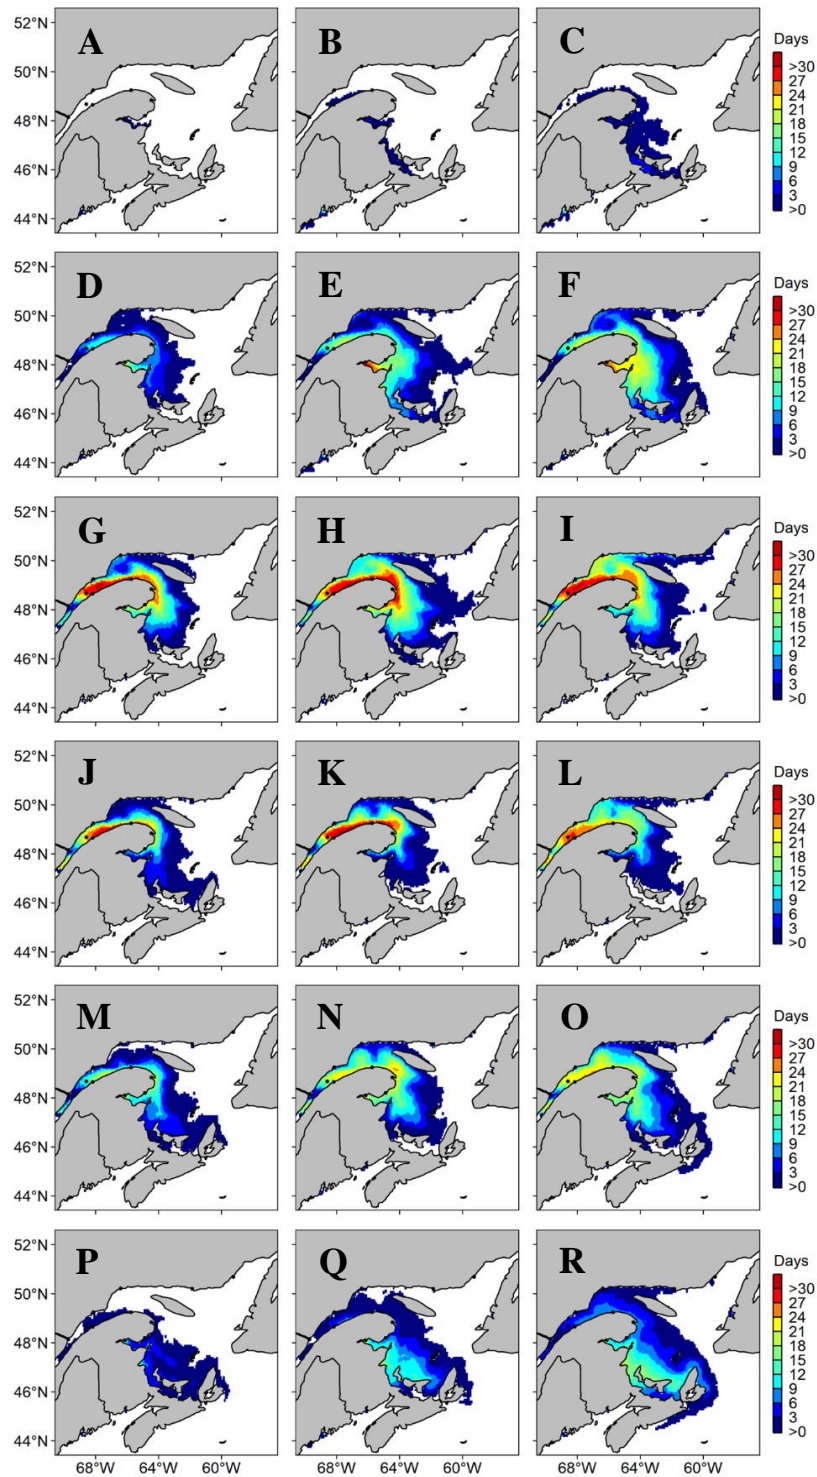

**Supplementary Figure S19.** Average number of risk days with *Alexandrium catenella*  $\geq 1000$  cells  $L^{-1}$  along Canada's East Coast under MPI-ESM-LR RCP 4.5 for (A) May 1999-2008, (B) May 2050-2059 and (C) May 2090-2099. Same pattern applies for (D-F) June, (G-I) July, (J-L) August, (M-O) September and (P-R) October estimated using the HARM.



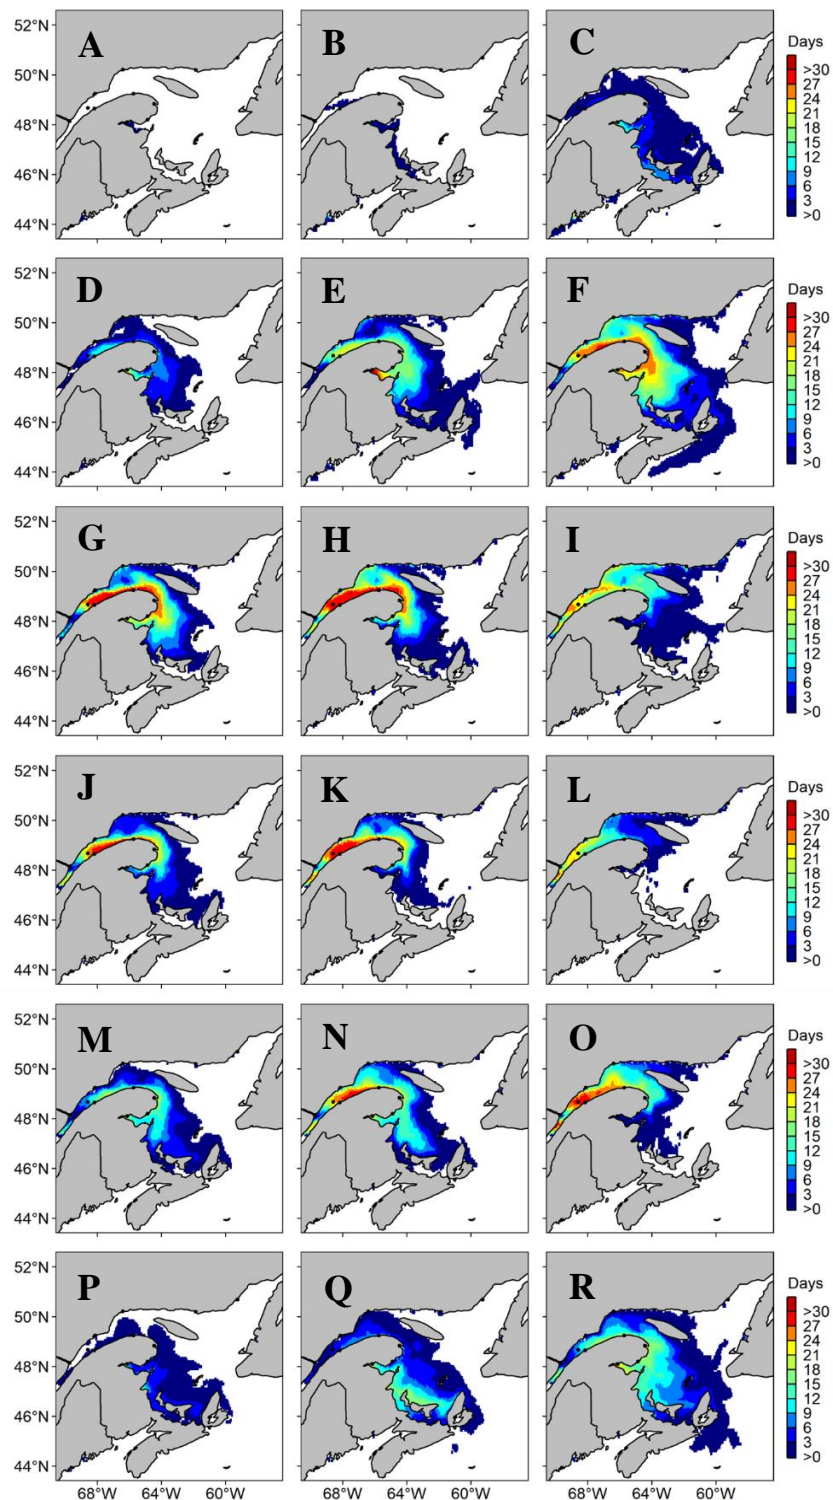

**Supplementary Figure S20.** Average number of risk days with *Alexandrium catenella*  $\geq 1000$  cells  $L^{-1}$  along Canada's East Coast under MPI-ESM-LR RCP 8.5 for (A) May 1999-2008, (B) May 2050-2059 and (C) May 2090-2099. Same pattern applies for (D-F) June, (G-I) July, (J-L) August, (M-O) September and (P-R) October using the HARM.



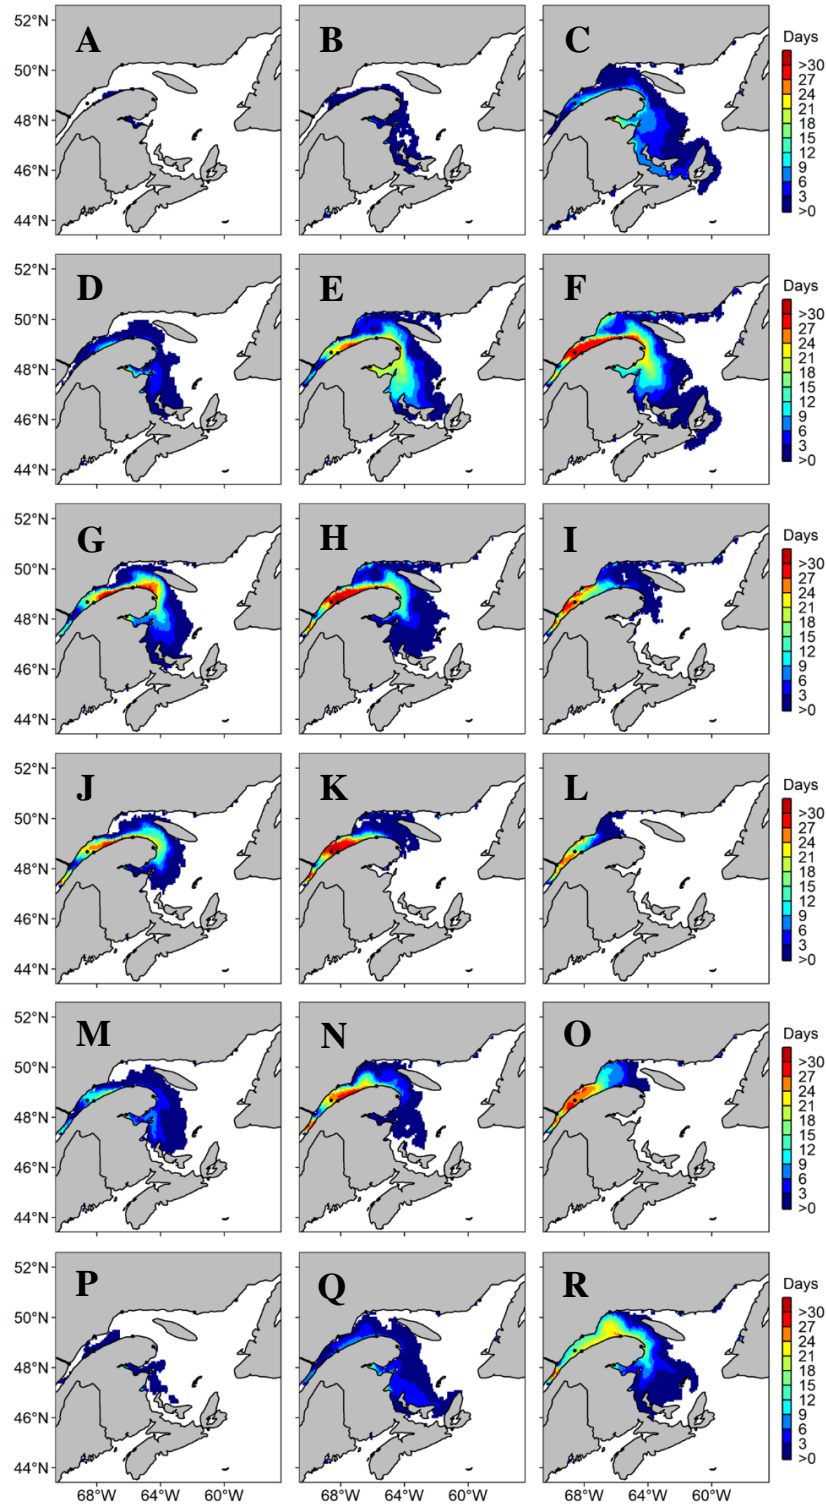

**Supplementary Figure S21.** Average number of risk days with *Alexandrium catenella*  $\geq 1000$  cells  $L^{-1}$  along Canada's East Coast under CanESM2 RCP 8.5 for (A) May 1999-2008, (B) May 2050-2059 and (C) May 2090-2099. Same pattern applies for (D-F) June, (G-I) July, (J-L) August, (M-O) September and (P-R) October using the HARM.
